# Supplementary material for: Influence of main-chain and molecular weight on the phase behaviors of side-chain liquid crystalline polymers without the spacer
Source: Royal Society of Chemistry journal article supplement (doi:10.1039/c5nj01315a), 2015-01-01
Supplement: c5nj01315a1.pdf [file c5nj01315a1.pdf]

## Influence of Main-chain and Molecular Weight on the Phase Behaviors of Side-Chain Liquid Crystalline Polymers without the Spacer

Ni Bin, Luo Yongbin, Liu Yujie, Chen Sheng\*, Zhang Hailiang\*

5 Key Laboratory of Polymeric Materials and Application Technology of Hunan Province, Key Laboratory of Advanced Functional Polymer Materials of Colleges and Universities of Hunan Province, College of Chemistry, Xiangtan University, Xiangtan 411105, Hunan Province, China

**4-methoxy-4'-hydroxybiphenyls:** Dimethyl sulfate (68g, 0.54 mol) was added dropwise to a water 10 (400 mL) solution of 4,4'-dihydroxybiphenyl (100 g, 0.54 mol) and NaOH (43 g, 1.08 mol) at room temperature. The reaction process produced lots of solid. After 1 hour, the resulting precipitate was collected by filtration, washed with NaOH solution and hot water, neutralized by aqueous HCl, and dried under vacuum. The product was purified by recrystallization from ethanol.

**4-alkyloxy-4'-hydroxybiphenyls:** 4-Alkyloxy-4-hydroxybiphenyls were synthesized by standard 15 methods from 4,4'-biphenyldiol with bromoalkanes in the presence of K<sub>2</sub>CO<sub>3</sub>. The mixture was heated for 12 h in 55 °C, next the reaction mixture poured into a large amount of water to precipitate products. The products were purified by precipitation in water from THF solution three times. At last, the crude products were purified by column chromatograph (silica gel, CH<sub>2</sub>Cl<sub>2</sub>). The final product of 4-alkoxybiphenol was white powder.

20 **4, 4'-alkoxybiphenyl acrylate:** 0.3mol acryloyl chloride and 1.5 mol TEA were dissolved in 200mL THF. Under intense stirring at 0 °C, 0.1 mol 4-alkyloxy-4-hydroxybiphenyls was slowly added into the above solution over a period of 2 h. The mixture was further stirred at room temperature for 12 h, the mixture was filtered in order to remove inorganic salts. Then the reaction mixture was precipitated into a large amount of water, and was filtered. At last, the crude products were purified by column 25 chromatograph (silica gel, CH<sub>2</sub>Cl<sub>2</sub>/ petroleum ether=10/1). The characterization data of monomers were as follows:

MBiA-1:  $^1\text{H}$  NMR ( $\text{CDCl}_3$ ): 3.80-3.89 (s, 3H,  $-\text{O}-\text{CH}_3$ ), 6.02-6.05 (d, H,  $=\text{CH}_2$ ), 6.32-6.39 (q, H,  $-\text{CH}=\text{}$ ), 6.61-6.66 (d, H,  $=\text{CH}_2$ ), 6.97-7.55 (m, 8H, Ar-H). Mass Spectrometry (MS) (m/z) [M] Calcd for  $\text{C}_{16}\text{H}_{14}\text{O}_3$ , 254.09.; found, 254.12.

MBiA-4:  $^1\text{H}$  NMR ( $\text{CDCl}_3$ ):  $\delta$  = 0.86-1.83 (m, 7H, alkoxy H), 3.99-4.03 (t, 2H,  $-\text{O}-\text{CH}_2-$ ), 6.01-6.04(d, 5 H,  $=\text{CH}_2$ ), 6.38-6.31 (q, H,  $-\text{CH}=\text{}$ ), 6.65-6.61 (d, H,  $=\text{CH}_2$ ). 6.96-7.71 (m, 8H, Ar-H), Mass Spectrometry (MS) (m/z) [M] Calcd for  $\text{C}_{19}\text{H}_{20}\text{O}_3$ , 296.14.; found, 296.27.

MBiA-6:  $^1\text{H}$  NMR ( $\text{CDCl}_3$ ):  $\delta$  = 0.81-1.81 (m, 11H, alkoxy H), 3.98-4.01 (t, 2H,  $-\text{O}-\text{CH}_2-$ ), 6.01-6.04(d, H,  $=\text{CH}_2$ ), 6.31-6.38 (q, H,  $-\text{CH}=\text{}$ ), 6.61-6.65 (d, H,  $=\text{CH}_2$ ), 6.98-7.57 (m, 8H, Ar-H). Mass Spectrometry (MS) (m/z) [M] Calcd for  $\text{C}_{21}\text{H}_{24}\text{O}_3$ , 324.17.; found, 324. 68.

10 MBiA-10:  $^1\text{H}$  NMR ( $\text{CDCl}_3$ ):  $\delta$  = 0.81-1.81 (m, 19H, alkoxy H), 3.99-4.1 (t, 2H,  $-\text{O}-\text{CH}_2-$ ), 6.0-6.03(d, H,  $=\text{CH}_2$ ), 6.30-6.37 (q, H,  $-\text{CH}=\text{}$ ), 6.60-6.63 (d, H,  $=\text{CH}_2$ ), 6.9-7.6 (m, 8H, Ar-H). Mass Spectrometry (MS) (m/z) [M] Calcd for  $\text{C}_{25}\text{H}_{32}\text{O}_3$ , 380.24.; found, 380.386.

MBiA-18:  $^1\text{H}$  NMR ( $\text{CDCl}_3$ ):  $\delta$  = 0.81-1.81 (m, 35H, alkoxy H), 4.01-3.98 (t, 2H,  $-\text{O}-\text{CH}_2-$ ), 6.01-6.04 (d, H,  $=\text{CH}_2$ ), 6.31-6.38 (q, H,  $-\text{CH}=\text{}$ ), 6.60-6.65(d, H,  $=\text{CH}_2$ ), 6.98-7.57 (m, 8H, Ar-H). Mass Spectrometry (MS) (m/z) [M] Calcd for  $\text{C}_{33}\text{H}_{48}\text{O}_3$ , 492.36.; found, 492.41.

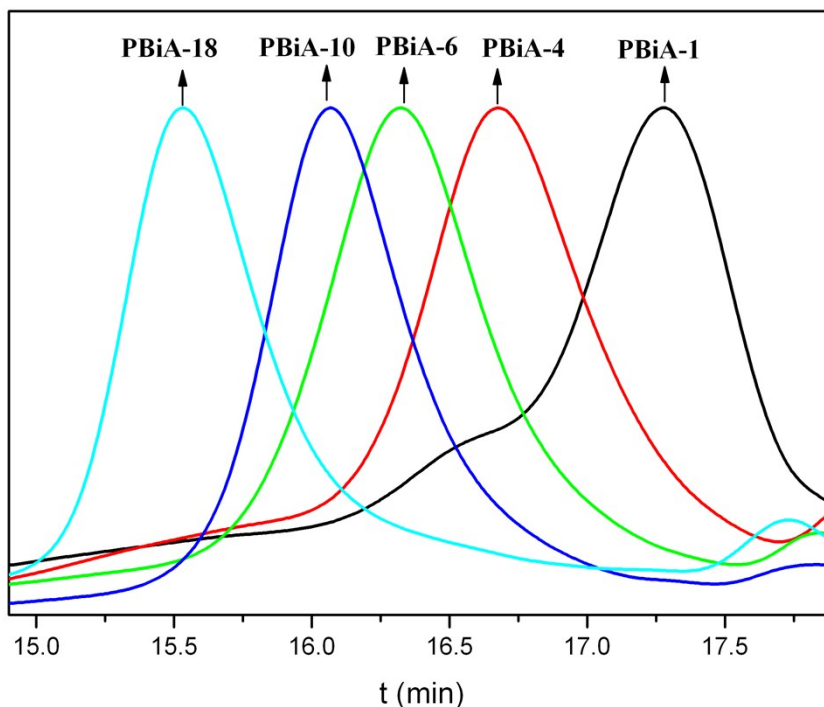

**Figure S1** GPC trace of PBiA-m with low  $M_n$ .

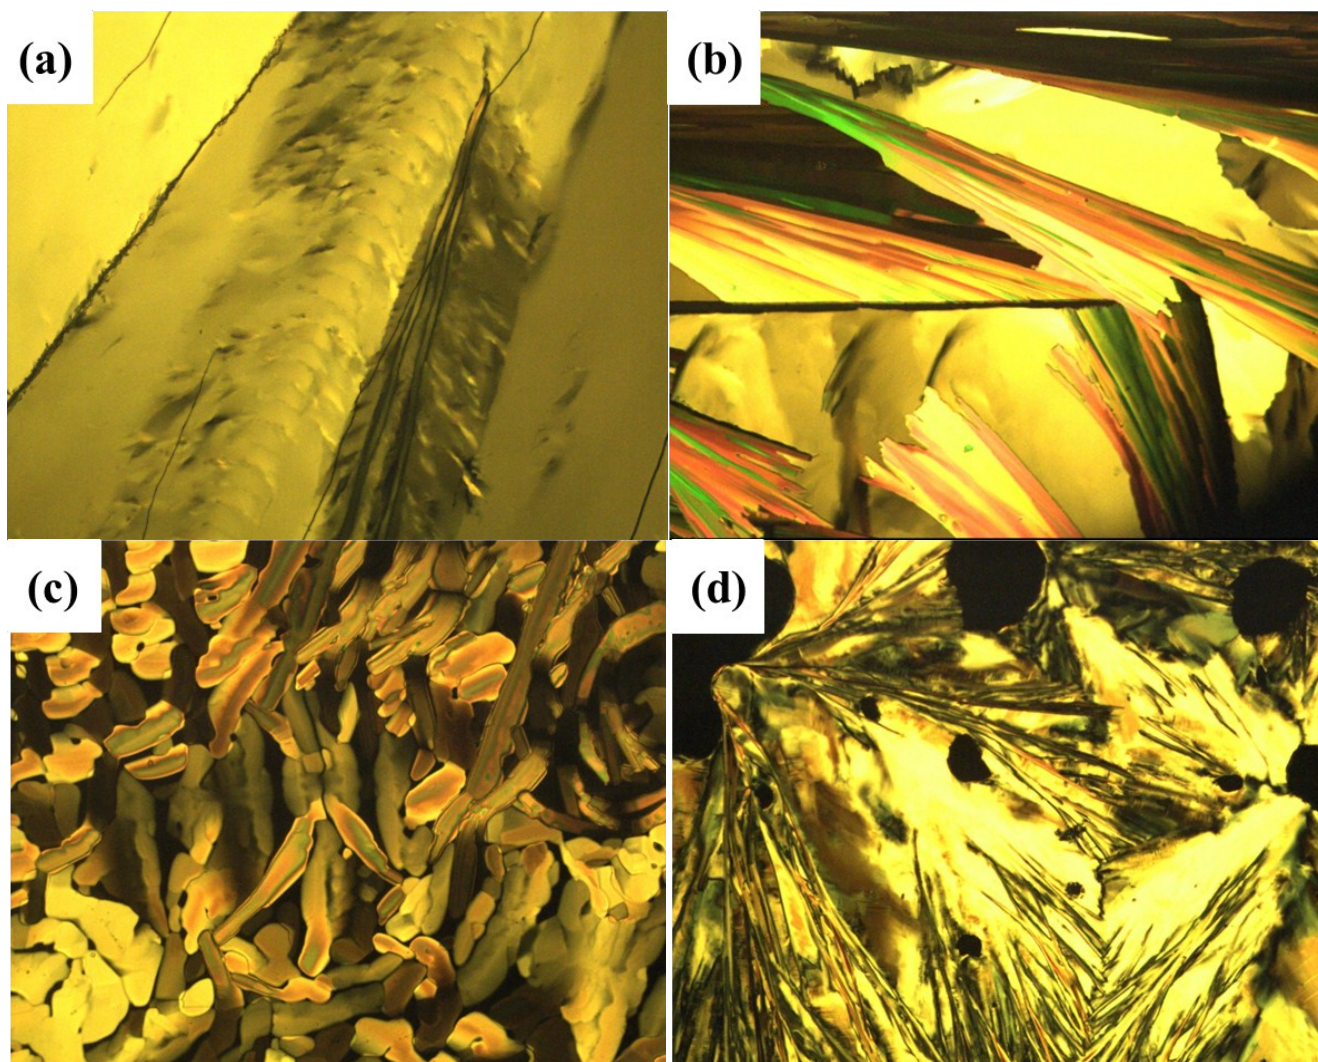

**Figure S2** Representative POM images of the texture of the MBiA-1 (a), MBiA-4 (b), MBiA-6 (c) and MBiA-18 (d) maintained at 25°C (b) (Magnification:  $\times 200$ ).

5

**Table S1** Properties of PBiA-m ( $m = 1, 4, 6, 10, 18$ ) with low  $M_n$

| Sample  | $M_n(\times 10^3)^a$ | PDI <sup>a</sup> | $T_i(^{\circ}\text{C})^b$ |
|---------|----------------------|------------------|---------------------------|
| PBiA-1  | 1.2                  | 1.15             | 210                       |
| PBiA-4  | 2.4                  | 1.15             | 300                       |
| PBiA-6  | 3.7                  | 1.13             | 282                       |
| PBiA-10 | 5.1                  | 1.12             | 275                       |
| PBiA-18 | 9.0                  | 1.13             | 280                       |

a. Relative  $M_n$  and PDI were measured by GPC using PS standards.

b. The transition temperature from liquid crystalline phase to isotropic phase measured by POM at a



heating rate of  $10\text{ }^{\circ}\text{C min}^{-1}$  during the second heating process.

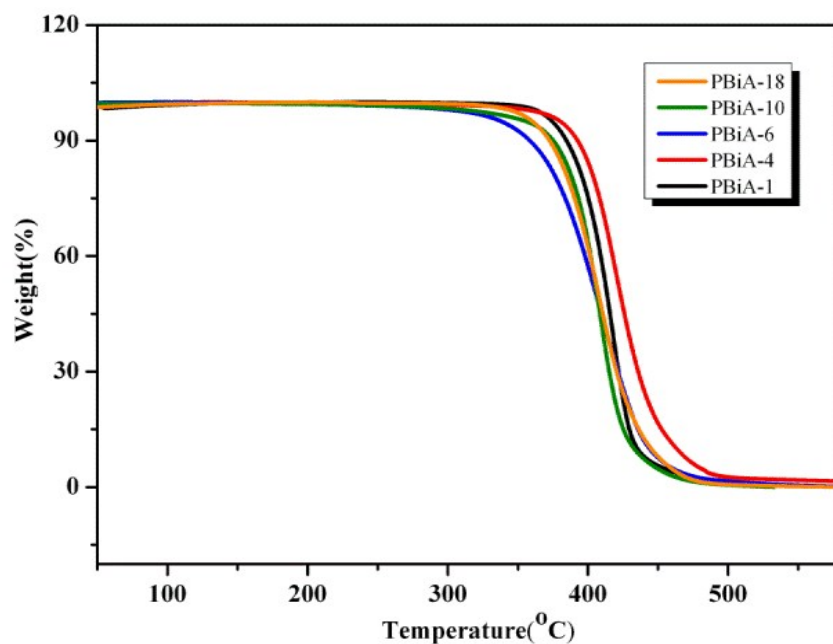

**Figure S3** TG curve of PBiA-m at a rate of  $20\text{ }^{\circ}\text{C min}^{-1}$  under nitrogen atmosphere.

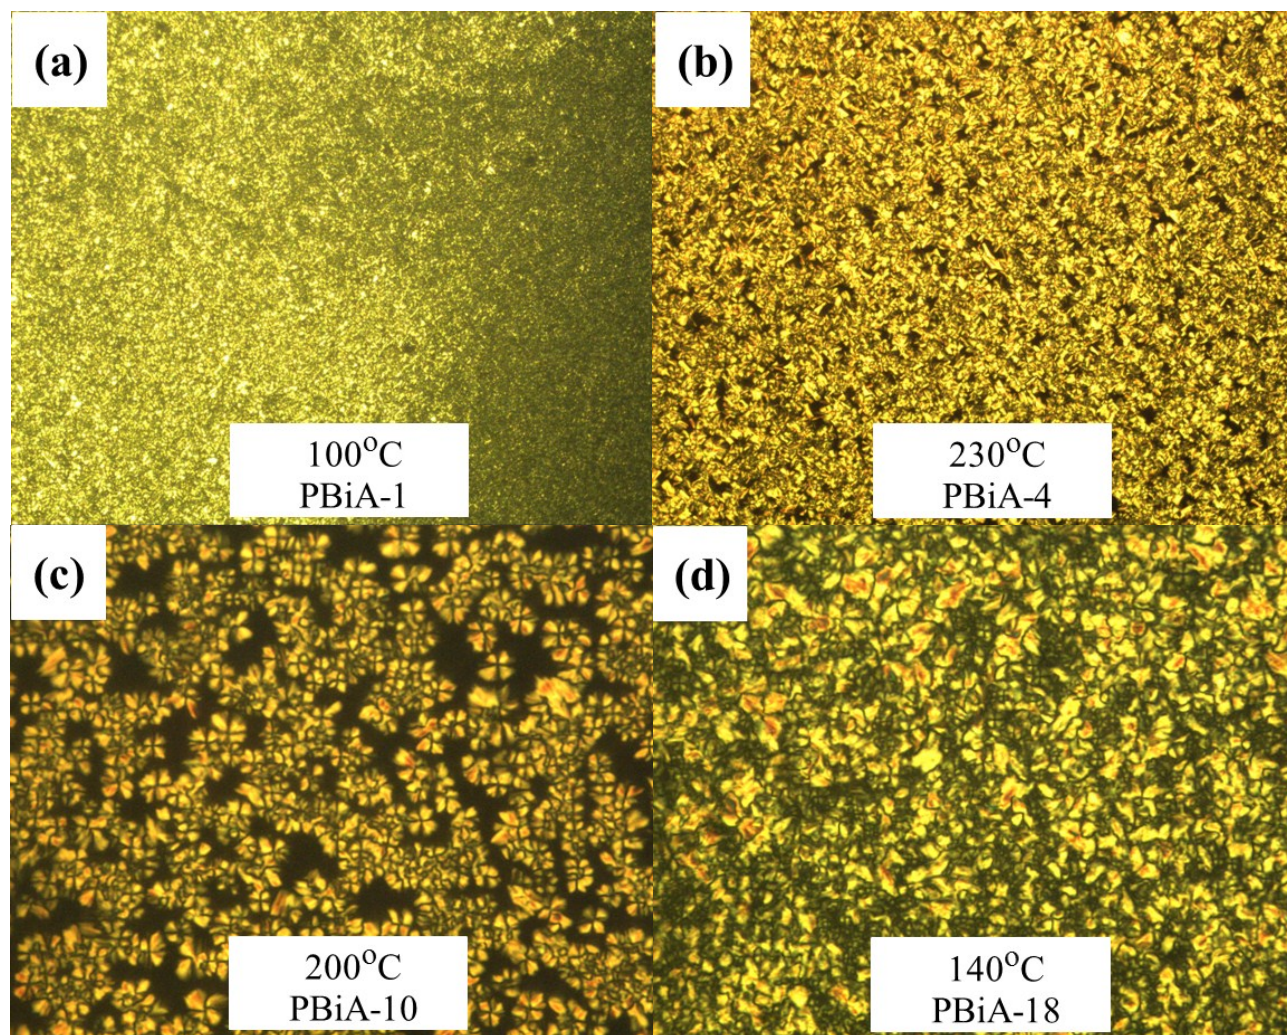

**Figure S4** Representative POM images of the texture of the PBiA-1 (a), PBiA-4 (b), PBiA-10 (c) and PBiA-18 (d) with low  $M_n$  (Magnification:  $\times 200$ ).

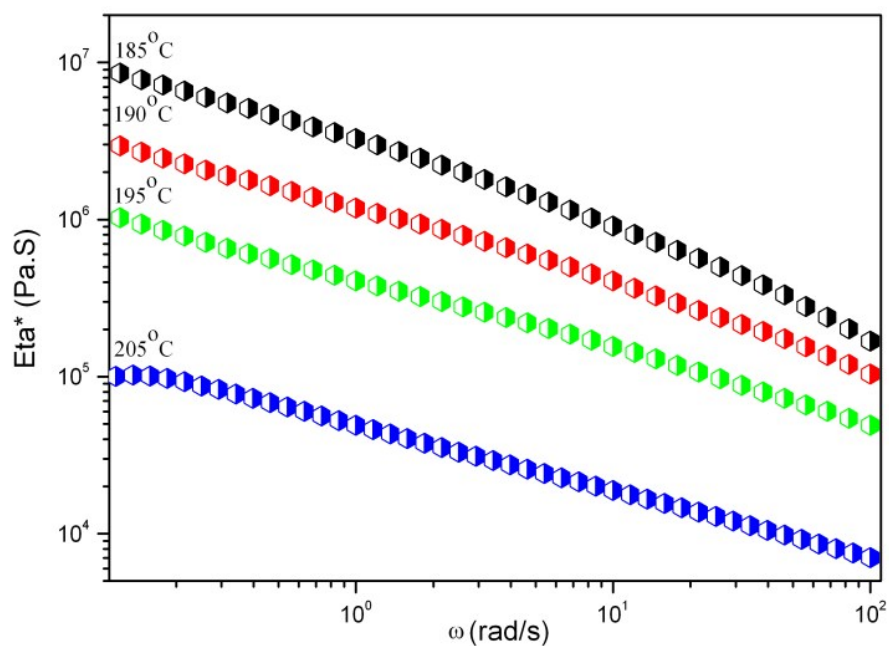

**Figure S5** Viscosity versus shear rate at various temperatures.

5

10
